# Supplementary material
Source: PubMed Central journal article supplement (PMC8804850)
Supplement: sj-pdf-1-car-10.1177_19476035211007902.pdf [file sj-pdf-1-car-10.1177_19476035211007902.pdf]

**Table S1.** Database Search Strategy

| Database       | Search Strategy                                                                                                                                                                                                                                                                                                                                                                                                                                                                                                                                                                                                                                                                            |
|----------------|--------------------------------------------------------------------------------------------------------------------------------------------------------------------------------------------------------------------------------------------------------------------------------------------------------------------------------------------------------------------------------------------------------------------------------------------------------------------------------------------------------------------------------------------------------------------------------------------------------------------------------------------------------------------------------------------|
| PubMed         | (((((cartilage OR hyaline OR chondral OR osteochondral OR chondrocyte) AND (regeneration OR repair OR heal OR therapy OR stimulation OR restoration)) AND (knee OR tibiofemoral OR patellofemoral)) AND (osteoarthritis OR OA OR osteoarthritic OR arthritis OR arthrosis)) AND (photobiomodulation OR phototherapy OR laser OR light OR LLLT OR "low-level laser" OR "low-level light" OR PBMT))                                                                                                                                                                                                                                                                                          |
| EMBASE         | ('cartilage'/exp OR cartilage OR 'hyaline'/exp OR hyaline OR chondral OR osteochondral OR 'chondrocyte'/exp OR chondrocyte) AND ('regeneration'/exp OR regeneration OR 'repair'/exp OR repair OR heal OR 'therapy'/exp OR therapy OR 'stimulation'/exp OR stimulation OR restoration) AND ('knee'/exp OR knee OR tibiofemoral OR patellofemoral) AND ('osteoarthritis'/exp OR osteoarthritis OR oa OR osteoarthritic OR 'arthritis'/exp OR arthritis OR 'arthrosis'/exp OR arthrosis) AND ('photobiomodulation'/exp OR photobiomodulation OR 'phototherapy'/exp OR phototherapy OR 'laser'/exp OR laser OR 'light'/exp OR light OR llst OR 'low-level laser' OR 'low-level light' OR pbmt) |
| Scopus         | (TITLE-ABS-KEY ( cartilage OR hyaline OR chondral OR osteochondral OR chondrocyte ) AND TITLE-ABS-KEY ( regeneration OR repair OR heal OR therapy OR stimulation OR restoration ) AND TITLE-ABS-KEY ( knee OR tibiofemoral OR patellofemoral ) AND TITLE-ABS-KEY ( osteoarthritis OR OA OR osteoarthritic OR arthritis OR arthrosis ) AND TITLE-ABS-KEY ( photobiomodulation OR phototherapy OR laser OR light OR llst OR "low-level laser" OR "low-level light" OR pbmt ) )                                                                                                                                                                                                               |
| Web Of Science | (cartilage OR hyaline OR chondral OR osteochondral OR chondrocyte) AND (regeneration OR repair OR heal OR therapy OR stimulation OR restoration) AND (knee OR tibiofemoral OR patellofemoral) AND (osteoarthritis OR OA OR osteoarthritic OR arthritis OR arthrosis) AND (photobiomodulation OR phototherapy OR laser OR light OR LLLT OR "low-level laser" OR "low-level light" OR PBMT)                                                                                                                                                                                                                                                                                                  |

**Table S2.** Light therapy parameters for *in vitro* and *in vivo* studies

| Type of study   | First author, year | Laser type       | Wavelength (nm) | Operating Mode | Frequency (Hz)<br>Duty Cycle (%)<br>Pulse | Power (mW) | Power density (mW/cm <sup>2</sup> ) | Beam spot size (cm <sup>2</sup> ) | Energy per point (J) | Total energy (J) | Energy density (J/cm <sup>2</sup> ) | Ir |
|-----------------|--------------------|------------------|-----------------|----------------|-------------------------------------------|------------|-------------------------------------|-----------------------------------|----------------------|------------------|-------------------------------------|----|
| <i>In vitro</i> | Sakata, 2020       | NR (Laser diode) | 910             | Pulsed         | 30000<br>0.6<br>200 ns                    | 300 (mean) | 600                                 | NR                                | NA                   | NR               | 4 or 8                              | 24 |

|                       |                   |                         |       |            |                     |                             |      |        |      |      |                           |          |
|-----------------------|-------------------|-------------------------|-------|------------|---------------------|-----------------------------|------|--------|------|------|---------------------------|----------|
|                       | Yang, 2020        | He-Ne<br>(Laser diode)  | 632.8 | Continuous | NA                  | 12                          | NR   | 0.91   | NA   | NR   | 5.74                      | 60<br>48 |
|                       | Jia, 2004         | He-Ne<br>(Laser diode)  | 632.8 | Continuous | NA                  | 2, 4, 6,<br>8, 10<br>and 12 | NR   | NR     | NA   | NR   | 1, 2, 3,<br>4, 5<br>and 6 |          |
|                       | Trevisan,<br>2020 | GaAlAs<br>(LED)         | 850   | Continuous | NA                  | 200                         | 0.4  | 0.5    | 3    | 6    | NR                        |          |
|                       | Yamada,<br>2019   | GaAs<br>(Laser diode)   | 904   | Pulsed     | 9500<br>20<br>60 ns | 40<br>(mean)                | NR   | 0.1309 | NR   | NR   | 3 and 9                   |          |
|                       | Li,<br>2020       | NR                      | 10600 | NR         | NR                  | NR                          | 80   | NR     | 47.1 | 47.1 | 1500                      |          |
|                       | Balbinot,<br>2019 | GaAlAs<br>(Laser diode) | 850   | Continuous | NA                  | 100                         | 1430 | 0.01   | 4    | 16   | 57.14                     |          |
|                       | Stancker,<br>2018 | GaAlAs<br>(Laser diode) | 808   | Continuous | NA                  | 50                          | 1780 | 0.028  | 2    | 8    | 71.2                      |          |
|                       | Sanches,<br>2018  | GaAlAs<br>(Laser diode) | 808   | Continuous | NA                  | 50                          | 1700 | 0.028  | 1.4  | 2.7  | 50                        |          |
| <b><i>In vivo</i></b> | Assis, 2018       | GaAlAs<br>(Laser diode) | 808   | Continuous | NA                  | 50                          | 1700 | 0.28   | 1.4  | 2.7  | 50                        |          |
|                       | Tomazoni<br>2017  | NR<br>(Laser diode)     | 830   | Continuous | NA                  | 100                         | 3570 | 0.028  | 6    | 6    | 214.2                     |          |
|                       | Mahmoud,<br>2017  | NR                      | 850   | Pulsed     | 16<br>NR<br>NR      | 200<br>(mean)               | NR   | NR     | NR   | NA   | 3.6                       |          |
|                       | Tomazoni,<br>2016 | NR<br>(Laser diode)     | 830   | Continuous | NA                  | 100                         | 3570 | 0.028  | 6    | 6    | 214.2                     |          |
|                       | Oliveira,<br>2016 | GaAlAs<br>(Laser diode) | 808   | Continuous | NA                  | 50                          | 1780 | 0.028  | 4    | 8    | 144                       |          |
|                       | Assis, 2016       | GaAlAs<br>(Laser diode) | 808   | Continuous | NA                  | 50                          | 1700 | 0.028  | 1.4  | 2.7  | 50                        |          |
|                       | Milares,<br>2016  | GaAlAs<br>(Laser diode) | 808   | Continuous | NA                  | 50                          | 1700 | 0.028  | 1.4  | 2.7  | 50                        |          |

|                  |                                  |                                               |            |                  |              |                       |       |             |                      |                           |   |
|------------------|----------------------------------|-----------------------------------------------|------------|------------------|--------------|-----------------------|-------|-------------|----------------------|---------------------------|---|
| Mangueira, 2015  | NR                               | 660 and 780                                   | Continuous | NA               | 30           | 750                   | 0.04  | NR          | 0.3                  | 7.5                       |   |
| Santos, 2014     | GaAlAs (Laser diode)             | 808                                           | Continuous | NA               | 50           | 1780                  | 0.028 | 2 and 4     | 4 and 8              | 71.4 and 142.8            | 4 |
| Wang, 2014       | He-Ne                            | 830                                           | Continuous | NA               | 50           | NR                    | 0.028 | 0.13        | 0.78                 | 4.8                       |   |
| Dos Santos, 2014 | GaAlAs (Laser diode)             | 685                                           | Continuous | NA               | 30           | NR                    | 0.028 | 0.3 and 1.4 | 0.6 and 2.8          | 10 and 50                 | 1 |
| Bublitz, 2014    | GaAlAs (Laser diode)             | 808                                           | Continuous | NA               | 30           | NR                    | 0.028 | 0.3 and 1.4 | 0.6 and 2.8          | 10 and 50                 | 1 |
| Alves, 2014      | GaAlAs (Laser diode)             | 808                                           | Continuous | NA               | 50 and 100   | 1780 and 3500         | 0.028 | 4           | 8                    | 142                       | 8 |
| Oliveira, 2013   | GaAlAs (Laser diode)             | 830                                           | Continuous | NA               | 30           | NR                    | 0.028 | 0.3 and 1.4 | 0.6 and 2.8          | 10 and 50                 | 1 |
| Alves, 2013      | GaAl (Laser diode)               | 808                                           | Continuous | NA               | 50 and 100   | 1780 and 3500         | 0.028 | 4           | 8                    | 142.4                     | 8 |
| Kim, 2013a       | GaAlAs (Laser diode)             | 850                                           | Pulsed     | 16<br>NR<br>NR   | 200 (mean)   | NR                    | 0.07  | NR          | NR                   | 3.6                       |   |
| Kim, 2013b       | GaAlAs (Laser diode)             | 850                                           | Pulsed     | 16<br>NR<br>NR   | 200 (mean)   | NR                    | 0.07  | NR          | NR                   | 3.6                       |   |
| Lin, 2012        | NR                               | 810                                           | Continuous | NA               | NR           | 5                     | NR    | NR          | NR                   | 3                         |   |
| De Rosa, 2012    | InGaAlP and AsGaAl (Laser diode) | 660 and 808                                   | Continuous | NA               | 100          | 3570                  | 0.028 | 4           | 16                   | 142                       |   |
| Oshima, 2011     | LEDs                             | 630 nm (red) and 870 nm (infrared: IR).       | Pulsed     | NR<br>16<br>NR   | NR           | 3.2 (red)<br>4 (IR)   | NA    | NA          | 88 (red)<br>110 (IR) | 2 (red)<br>2.5 (IR)       |   |
| Zhao, 2011       | NR                               | 10600 (CO <sub>2</sub> : IR) and 650 nm (Red) | NR         | NR               | NR           | 200 (IR) and 36 (red) | NR    | NR          | NR                   | 22.93 (IR) and 4.13 (red) |   |
| Kamali 2007      | GaAs (Laser diode)               | 890                                           | Pulsed     | 1500<br>NR<br>NR | 60000 (mean) | NR                    | 1     | NR          | NR                   | 4.8                       |   |

|           |              |     |            |                    |    |     |    |    |    |    |
|-----------|--------------|-----|------------|--------------------|----|-----|----|----|----|----|
| Lin, 2006 | He-Ne        | 632 | Continuous | NA                 | NR | 3.1 | NR | NR | NR | NR |
| Cho, 2004 | GaAs & He-Ne | NR  | Pulsed     | 2500<br>100%<br>NR | NR | NR  | NR | NR | NR | NR |

**LEGEND:** He-Ne: Helium-Neon; GaAlAs: Gallium-Aluminium-Arsenide; GaAs: Gallium-Arsenide; AlGa: Aluminium-Gallium; InGaAlP: Indium-Gallium-Aluminium-Phosphide; LED: Light-emitting Diode; NR – not reported; NA – not applicable

**Table S3.** Median, 25 and 75 percentiles, minimum and maximum light therapy parameters values and number of reporting studies (%)

| <b>PBMT Parameters</b>                          | <b><i>In vitro</i></b> | <b><i>In vivo</i></b> |
|-------------------------------------------------|------------------------|-----------------------|
| <b><i>Laser type</i></b>                        |                        |                       |
| <b>He-Ne laser</b>                              | 67%                    | 10%                   |
| <b>GaAs laser</b>                               | NA                     | 10%                   |
| <b>GaAlAs</b>                                   | NA                     | 23%                   |
| <b>Others (AlGa, INGaIP, LED)</b>               | NA                     | 10%                   |
| <b>Studies reporting (%)</b>                    | 67% (of k=3)           | 77% (of k=30)         |
| <b><i>Wavelength (nm)</i></b>                   |                        |                       |
| <b>Median (25-75%)</b>                          | 632.8 (632.8-910)      | 808 (801-850)         |
| <b>Min-max</b>                                  | 632.8-910              | 630-904               |
| <b>Studies reporting (%)</b>                    | 100% (of k=3)          | 97% (of k=30)         |
| <b><i>Operating Mode</i></b>                    |                        |                       |
| <b>Continuous</b>                               | 67%                    | 70%                   |
| <b>Pulsed</b>                                   | 33%                    | 23%                   |
| <b>Studies reporting (%)</b>                    | 100% (of k=3)          | 93% (of k=30)         |
| <b><i>Frequency (Hz)*</i></b>                   |                        |                       |
| <b>Median (25-75%)</b>                          |                        | 758 (16-4250)         |
| <b>Min-max</b>                                  | 3000                   | 16-9500               |
| <b>Studies reporting (%)</b>                    | 100% (of k=1)          | 86% (of k=7)          |
| <b><i>Duty Cycle (%)*</i></b>                   |                        |                       |
| <b>Median (25-75%)</b>                          |                        | 58 (16-100)           |
| <b>Min-max</b>                                  | 0.6                    | 16-100                |
| <b>Studies reporting (%)</b>                    | 100% (of k=1)          | 29% (of k=7)          |
| <b><i>Pulse duration (ns)*</i></b>              |                        |                       |
| <b>Median (25-75%)</b>                          |                        | 60                    |
| <b>Min-max</b>                                  | 200                    |                       |
| <b>Studies reporting (%)</b>                    | 100% (of k=1)          | 14% (of k=7)          |
| <b><i>Power (mW)</i></b>                        |                        |                       |
| <b>Median (25-75%)</b>                          | 7 (2.5-10)             | 50 (50-100)           |
| <b>Min-max</b>                                  | 1.2-300                | 30-60000              |
| <b>Studies reporting (%)</b>                    | 100% (of k=3)          | 80% (of k=30)         |
| <b><i>Power Density (mW/cm<sup>2</sup>)</i></b> |                        |                       |
| <b>Median (25-75%)</b>                          |                        | 1700 (4.7-1780)       |
| <b>Min-max</b>                                  | 600                    | 0.4-3570              |
| <b>Studies reporting (%)</b>                    | 33% (of k=3)           | 67% (of k=30)         |
| <b><i>Beam spot size (cm<sup>2</sup>)</i></b>   |                        |                       |
| <b>Median (25-75%)</b>                          |                        | 0.028 (0.028-0.07)    |
| <b>Min-max</b>                                  | 0.91                   | 0.01-1.0              |
| <b>Studies reporting (%)</b>                    | 33% (of k=3)           | 77% (of k=30)         |
| <b><i>Energy per point (J)</i></b>              |                        |                       |
| <b>Median (25-75%)</b>                          |                        | 2 (1.4-4)             |
| <b>Min-max</b>                                  | NA                     | 0.13-6                |
| <b>Studies reporting (%)</b>                    |                        | 60% (of k=30)         |

|                                                       |                  |                |
|-------------------------------------------------------|------------------|----------------|
| <b>Total energy (J)</b>                               |                  |                |
| <b>Median (25-75%)</b>                                | NR               | 5 (2.7-8)      |
| <b>Min-max</b>                                        |                  | 0.03-330       |
| <b>Studies reporting (%)</b>                          |                  | 70% (of k=3)   |
| <b>Energy density (J/cm<sup>2</sup>)</b>              |                  |                |
| <b>Median (25-75%)</b>                                | 4.0 (2.5-5.87)   | 50 (4.8-142)   |
| <b>Min-max</b>                                        | 1.0-8.0          | 2-1500         |
| <b>Studies reporting (%)</b>                          | 100% (of k=3)    | 90% (of k=3)   |
| <b>Irradiation time (s)</b>                           |                  |                |
| <b>Median (25-75%)</b>                                | 390 (210-690)    | 40 (28-87.5)   |
| <b>Min-max</b>                                        | 60-780           | 10-900         |
| <b>Studies reporting (%)</b>                          | 100% (of k=3)    | 100% (of k=3)  |
| <b>Treatment duration</b>                             |                  |                |
| <b>Once daily</b>                                     | 33%              | 17%            |
| <b>3 times a week</b>                                 | NA               | 37%            |
| <b>5 times a week</b>                                 |                  | 23%            |
| <b>Others (once, twice a week or every other day)</b> | 67%              | 10%            |
| <b>Studies reporting (%)</b>                          | 100% (of k=3)    | 87% (of k=3)   |
| <b>Number of sessions</b>                             |                  |                |
| <b>Median (25-75%)</b>                                | NA               | 15 (10-24)     |
| <b>Min-max</b>                                        |                  | 1-32           |
| <b>Studies reporting (%)</b>                          |                  | 87% (of k=3)   |
| <b>Application technique</b>                          |                  |                |
| <b>Skin contact</b>                                   | NA               | 57%            |
| <b>Transcutaneously</b>                               |                  | 23%            |
| <b>Laser fixation</b>                                 | 67%              | 3%             |
| <b>Studies reporting (%)</b>                          | 67% (of k=3)     | 83% (of k=3)   |
| <b>Irradiation area (cm<sup>2</sup>)</b>              |                  |                |
| <b>Median (25-75%)</b>                                | 0.91 (0.785-9.6) | 0.26 (0.07-44) |
| <b>Min-max</b>                                        | 0.785-9.6        | 0.07-44        |
| <b>Studies reporting (%)</b>                          | 100% (of k=3)    | 10% (of k=3)   |
| <b>Number of points irradiated</b>                    |                  |                |
| <b>Median (25-75%)</b>                                | NA               | 2 (1-2)        |
| <b>Min-max</b>                                        |                  | 1-6            |
| <b>Studies reporting (%)</b>                          |                  | 83% (of k=3)   |

**LEGEND:** He-Ne: Helium-Neon; GaAlAs: Gallium-Aluminium-Arsenide; GaAs: Gallium-Arsenide; AlGa: Aluminium-Gallium; InGaAlP: Indium-Gallium-Aluminium-Phosphide; LED: Light-emitting Diode; k – number of studies; NR – not reported; NA – not applicable

**Table S4.** Number of studies reporting (%) biochemical, histological and behavioural outcomes in *in vitro* and *in vivo* studies

| <b>Outcomes</b>                        | <b>Number of studies</b> |
|----------------------------------------|--------------------------|
| <i>In vitro</i>                        |                          |
| <i>Biochemical</i>                     |                          |
| <b>Chondrocytes activity</b>           | 67% (of k=3)             |
| <b>ECM synthesis/degradation</b>       | 100% (of k=3)            |
| <b>Inflammatory &amp; pain markers</b> | 67% (of k=3)             |
| <i>In vivo</i>                         |                          |
| <i>Biochemical</i>                     |                          |
| <b>Chondrocytes activity</b>           | NA                       |
| <b>ECM synthesis/degradation</b>       | 64% (of k=25)            |
| <b>Inflammatory &amp; pain markers</b> | 88% (of k=25)            |
| <i>Histological</i>                    |                          |
| <b>Osteoarthritis grade</b>            | 62% (of k=21)            |
| <b>Morphometric analysis</b>           | 38% (of k=21)            |
| <b>Cartilage organization</b>          | 90% (of k=21)            |
| <i>Behavioural</i>                     |                          |
| <b>Gait performance</b>                | 29% (of k=7)             |
| <b>Weight bearing</b>                  | 57% (of k=7)             |
| <b>Mechanical hyperplasia</b>          | 57% (of k=7)             |
| <b>Maximum Knee extension</b>          | 14% (of k=7)             |

**LEGEND:** k:  
number of  
studies; NA:  
applicable

not
